# Supplementary material for: Sex Differences in Cognitive Reflection: A Meta-Analysis
Source: MDPI journal article supplement (doi:10.3390/jintelligence12040039), 2024-03-29
Supplement: s1 [file s1]

SEX DIFFERENCES ON COGNITIVE REFLECTION: A META-ANALYSIS

**Supplementary Materials of the Manuscript:**

**Sex Differences on Cognitive Reflection: A meta-analysis**

Inmaculada Otero, Alexandra Martínez, Dámaris Cuadrado, Mario Lado, Silvia Moscoso, and  
Jesús F. Salgado

**Table S1.***Studies Included in the Meta-analysis of the Sex Differences on CR*

| Study                      | Year | Type of CRT | N     | $d_{xy}$ | $r_{xx}$ | Sample     |
|----------------------------|------|-------------|-------|----------|----------|------------|
| Aczel et al.               | 2015 | original    | 864   | 0.256    | .62      |            |
| Aktas et al.               | 2017 | original    | 267   | 0.124    | .54      | Study 1    |
|                            |      | original    | 239   | 0.345    | .63      | Study 2    |
|                            |      | original    | 382   | -0.165   | .73      | Study 3    |
| Albaity et al.             | 2014 | original    | 880   | 0.486    | -        |            |
| Alós-Ferrer et al.         | 2016 | original    | 155   | 0.476    | -        |            |
| Alós-Ferrer & Hügelschäfer | 2012 | original    | 416   | 0.827    | -        | Exp. 1     |
|                            |      | original    | 111   | 0.528    | -        | Exp. 2     |
|                            |      | original    | 364   | 0.335    | -        | Exp. Class |
| Avram                      | 2018 | original    | 194   | 0.441    | -        |            |
| Bar-Hillel et al.          | 2019 | V-CRT       | 394   | 0.056    | .49      |            |
| Baron et al.               | 2015 | original    | 103   | 0.242    | .62      |            |
| Bialek et al.              | 2019 | CRT-6       | 123   | 0.258    | .78      | Study 1    |
|                            |      | original    | 122   | 0.124    | .78      | Study 2    |
| Bosch-Doménech et al.      | 2014 | original    | 623   | 0.394    | -        |            |
| Bosley et al.              | 2019 | original    | 451   | 0.438    | .62      |            |
| Bronstein et al.           | 2019 | original    | 947   | 0.387    | .70      |            |
|                            |      | V-CRT       | 947   | 0.068    | .63      |            |
| Brosnan et al.             | 2014 | original    | 68    | 0.517    | -        |            |
| Browne et al.              | 2014 | original    | 1,137 | 0.538    | -        |            |
| Burger et al.              | 2020 | original    | 399   | 0.266    | .54      | Study 1    |
|                            |      | CRT-6       | 399   | 0.322    | .78      | Study 1    |
|                            |      | original    | 304   | 0.458    | .53      | Study 2    |
|                            |      | CRT-6       | 304   | 0.516    | .77      | Study 2    |
| Byrd & Conway              | 2019 | original    | 276   | 0.181    | .80      | Study 1    |
|                            |      | V-CRT       | 276   | -0.080   | -        | Study 1    |
|                            |      | original    | 191   | 0.120    | .78      | Study 2    |
|                            |      | V-CRT       | 191   | 0.100    | -        | Study 2    |
| Cáceres & San Martín       | 2017 | original    | 19    | 1.060    | -        |            |
| Calvillo et al.            | 2019 | CRT-7       | 411   | 0.539    | -        | Exp. 1     |
|                            |      | CRT-7       | 231   | 0.086    | -        | Exp. 2     |
| Campitelli & Gerrans       | 2014 | original    | 2,019 | 0.336    | .66      |            |
| Campitelli & Labollita     | 2010 | original    | 155   | 0.220    | -        |            |
| Capraro et al.             | 2017 | CRT-7       | 677   | 0.604    | -        |            |
| Čavojová et al.            | 2019 | CRT-7       | 121   | 0.604    | .77      |            |
| Cheng & Janssen            | 2019 | V-CRT       | 135   | 0.110    | .60      |            |
| Corgnet et al.             | 2015 | CRT-7       | 150   | 0.603    | -        | Study 1    |
|                            |      | CRT-7       | 158   | 0.673    | -        | Study 2    |

**Table S1.***Continuation*

| Study                | Year  | Type of CRT | <i>N</i> | $d_{xy}$ | $r_{xx}$ | Sample   |
|----------------------|-------|-------------|----------|----------|----------|----------|
| Corgnet et al.       | 2016  | CRT-7       | 150      | 0.549    | -        |          |
| Drummond & Fischhoff | 2017  | original    | 395      | 0.383    | .80      | Study 1a |
|                      |       | original    | 393      | 0.324    | .73      | Study 1c |
|                      |       | original    | 268      | 0.307    | .80      | Study 2  |
| Duttle & Inukai      | 2015  | original    | 66       | 1.155    | -        |          |
| Finucane & Gullion   | 2010  | CRT-6       | 608      | 0.408    | .80      |          |
| Fosgaard et al.      | 2019  | original    | 1,926    | 0.377    | -        |          |
| Frederick            | 2005  | original    | 3,428    | 0.112    | -        |          |
| Gervais et al.       | 2018  | original    | 3,461    | 0.370    | -        |          |
| Grossman et al.      | 2014  | CRT-4       | 224      | 0.346    | -        |          |
| Guthrie et al.       | 2007  | original    | 241      | 0.132    | -        |          |
| Kahan                | 2017  | original    | 1,993    | 0.381    | .65      |          |
| Kiss et al.          | 2016  | original    | 900      | 0.343    | -        |          |
| Koehler & Pennycook  | 2019  | V-CRT       | 866      | 0.138    | .61      |          |
| Lohse                | 2016  | original    | 284      | 0.359    | -        |          |
| Narayanan & Moritz   | 2015  | original    | 96       | 0.062    | -        |          |
| Mandel & Kapler      | 2018  | original    | 190      | 0.636    | .71      | Exp. 1   |
|                      |       | original    | 316      | 0.223    | .80      | Exp. 2   |
| Muñoz-Murillo et al. | 2020  | original    | 195      | 0.676    | -        |          |
| Obrecht et al.       | 2009  | original    | 417      | 0.606    | -        |          |
| <sup>a</sup> Otero   | 2019  | original    | 1,367    | 0.452    | .58      |          |
|                      |       | CRT-10      | 1,367    | 0.632    | .70      |          |
| Otero                | 2020  | CRT-10      | 186      | 0.325    | .65      | Study 2  |
|                      |       | original    | 186      | 0.113    | .64      | Study 2  |
|                      |       | V-CRT       | 186      | 0.475    | .45      | Study 2  |
| Pennycook et al.     | 2012  | original    | 223      | 0.324    | -        | Study 1  |
|                      |       | original    | 267      | 0.473    | -        | Study 2  |
| Pennycook et al.     | 2016  | original    | 369      | 0.510    | -        |          |
| Pennycook & Rand     | 2019a | original    | 799      | 0.320    | .68      | Study 1  |
|                      |       | V-CRT       | 790      | 0.158    | .57      | Study 1  |
|                      |       | original    | 2,630    | 0.512    | .71      | Study 2  |
|                      |       | V-CRT       | 2,615    | 0.150    | .58      | Study 2  |
| Pennycook & Rand     | 2019b | original    | 401      | 0.351    | .74      | Study 1  |
|                      |       | V-CRT       | 401      | 0.092    | .63      | Study 1  |
|                      |       | original    | 397      | 0.233    | .74      | Study 2  |
|                      |       | V-CRT       | 395      | 0.134    | .54      | Study 2  |

**Table S1.***Continuation*

| Study                      | Year | Type of CRT | <i>N</i> | $d_{xy}$ | $r_{xx}$ | Sample   |
|----------------------------|------|-------------|----------|----------|----------|----------|
| Ponti & Carbone            | 2009 | original    | 48       | 0.873    | -        |          |
| Ponti et al.               | 2014 | original    | 192      | 0.512    | -        |          |
| <sup>a</sup> Primi et al.  | 2015 | original    | 939      | 0.340    | -        |          |
|                            |      | CRT-6       | 908      | 0.320    | .76      |          |
| Primi et al.               | 2018 | original    | 281      | 0.719    | -        | Study 1b |
|                            |      | original    | 282      | 0.624    | -        |          |
|                            |      | original    | 282      | 0.624    | -        |          |
|                            |      | original    | 282      | 0.529    | -        |          |
|                            |      | original    | 282      | 0.529    | -        |          |
|                            |      | original    | 282      | 0.529    | -        |          |
|                            |      | original    | 282      | 0.434    | -        |          |
|                            |      | original    | 282      | 0.434    | -        |          |
|                            |      | original    | 281      | 0.339    | -        |          |
|                            |      | CRT-6       | 181      | 0.699    | .76      | Study 2  |
| Razmyar & Reeve            | 2013 | original    | 150      | 0.606    | .64      |          |
| Royzman et al.             | 2014 | original    | 527      | 0.372    | .75      |          |
| Royzman et al.             | 2015 | CRT-6       | 548      | 0.335    | .85      |          |
| Sajid & Li                 | 2019 | original    | 601      | 0.508    | .72      |          |
| Schulze & Newell           | 2015 | original    | 58       | 0.817    | -        | Exp. 2a  |
|                            |      | original    | 58       | 0.829    | -        | Exp. 2b  |
| Sinayev & Peters           | 2015 | CRT-5       | 1,459    | 0.473    | -        | Study 2  |
| <sup>b</sup> Sirota et al. | 2021 | °CRT-N      | 112      | 0.160    | .75      |          |
|                            |      | °CRT-N      | 113      | 0.225    | .75      |          |
|                            |      | °CRT-N      | 113      | 0.225    | .75      |          |
|                            |      | °CRT-N      | 113      | 0.290    | .75      |          |
|                            |      | °CRT-N      | 113      | 0.290    | .75      |          |
|                            |      | °CRT-N      | 113      | 0.290    | .75      |          |
|                            |      | °CRT-N      | 113      | 0.355    | .75      |          |
|                            |      | °CRT-N      | 113      | 0.355    | .75      |          |
|                            |      | °CRT-N      | 111      | 0.420    | .75      |          |
|                            |      | V-CRT       | 112      | -0.200   | .83      |          |
|                            |      | V-CRT       | 113      | -0.130   | .83      |          |
|                            |      | V-CRT       | 113      | -0.130   | .83      |          |
|                            |      | V-CRT       | 113      | -0.060   | .83      |          |
|                            |      | V-CRT       | 113      | -0.060   | .83      |          |

**Table S1.***Continuation*

| Study                              | Year | Type of CRT | <i>N</i> | $d_{xy}$ | $r_{xx}$ | Sample   |
|------------------------------------|------|-------------|----------|----------|----------|----------|
|                                    |      | V-CRT       | 113      | -0.060   | .83      |          |
|                                    |      | V-CRT       | 113      | 0.010    | .83      |          |
|                                    |      | V-CRT       | 113      | 0.010    | .83      |          |
|                                    |      | V-CRT       | 111      | 0.070    | .83      |          |
| Skagerlund et al.                  | 2018 | original    | 2,058    | 0.432    | .63      |          |
| Šrol                               | 2019 | original    | 1,204    | 0.550    | .70      |          |
|                                    |      | CRT-4       | 1,204    | 0.520    | .65      |          |
| Stagnaro et al.                    | 2018 | original    | 2,759    | 0.364    | -        |          |
| Stagnaro et al.                    | 2019 | original    | 513      | 0.279    | .63      | Study 1  |
|                                    |      | original    | 545      | 0.421    | .69      | Study 2  |
|                                    |      | V-CRT       | 545      | 0.324    | .65      | Study 2  |
| Ståhl & Van Prooijen               | 2018 | original    | 333      | -0.098   | .72      | Study 1  |
|                                    |      | V-CRT       | 333      | -0.293   | .60      | Study 1  |
|                                    |      | original    | 302      | 0.345    | .74      | Study 2  |
|                                    |      | V-CRT       | 302      | 0.060    | .66      | Study 2  |
| Stieger & Reips                    | 2016 | original    | 2,127    | 0.275    | .64      |          |
| Svenson et al.                     | 2018 | original    | 122      | 0.438    | .69      |          |
| Teigen et al.                      | 2018 | original    | 130      | 0.570    | .71      |          |
| <sup>a</sup> Thomson & Oppenheimer | 2016 | original    | 129      | 0.813    | .62      |          |
|                                    |      | V-CRT       | 131      | 0.248    | .51      |          |
| <sup>a</sup> Toplak et al.         | 2014 | original    | 158      | 0.637    | -        |          |
|                                    |      | CRT-4       | 158      | 0.652    | -        |          |
| Toplak et al.                      | 2017 | CRT-11      | 232      | 0.473    | .80      |          |
| Ventis                             | 2015 | original    | 146      | 0.449    | .67      |          |
| Welsh et al.                       | 2013 | original    | 102      | 0.516    | -        |          |
| Willard & Norenzayan               | 2017 | original    | 1,006    | 0.306    | -        |          |
| Woike                              | 2019 | original    | 698      | 0.250    | .78      | Study 2  |
|                                    |      | CRT-3       | 698      | 0.330    | .66      | Study 2  |
| Yilmaz et al.                      | 2019 | original    | 8,647    | 0.445    | -        |          |
| Yilmaz & Saribay                   | 2016 | original    | 337      | 0.293    | .72      | Study 1  |
|                                    |      | original    | 691      | 0.600    | .50      | Study 2  |
|                                    |      | original    | 126      | 0.128    | .43      | Study 3a |
|                                    |      | original    | 86       | 0.473    | .70      | Study 3b |
| <sup>a</sup> Yilmaz & Saribay      | 2017 | original    | 395      | 0.366    | .75      |          |
|                                    |      | V-CRT       | 395      | -0.020   | .64      |          |
| Zhang et al.                       | 2016 | Original    | 205      | 0.370    | .75      |          |

---

*Note.*  $N$  = sample size;  $d_{xy}$  = observed effect size;  $r_{xx}$  = internal consistency reliability of CR; CRT-3 = cognitive reflection test of Frederick (2005); V-CRT = verbal-CRT.

<sup>a</sup>The effect sizes are from the same sample but using different CR test.

<sup>b</sup>The distribution of effect sizes were obtained from a meta-analytic study.

<sup>c</sup>The CRT used in this study is a mixture of the CRT-3 (Frederick, 2005) and the CRT-7 of Toplak et al. (2014).

## REFERENCES:

- Aczel, B., Bago, B., Szollosi, A., Foldes, A., and Lukacs, B. 2015. Measuring individual differences in decision biases: Methodological considerations. *Frontiers in Psychology*, 6, 1770. <https://doi.org/10.3389/fpsyg.2015.01770>
- Aktaş, B., Yılmaz, O., and Bahçekapılı, H. G. 2017. Moral pluralism on the trolley tracks: Different normative principles are used for 453 different reasons in justifying moral judgments. *Judgment and Decision Making*, 123, 297-307.
- Albaity, M., Rahman, M., and Shahidul, I. 2014. Cognitive reflection test and behavioral biases in Malaysia. *Judgment and Decision Making*, 92, 148-151.
- Alós-Ferrer, C., Garagnani, M., and Hügelschäfer, S. 2016. Cognitive reflection, decision biases, and response times. *Frontiers in Psychology*, 7, 1402. <https://doi.org/10.3389/fpsyg.2016.01402>
- Alós-Ferrer, C., and Hügelschäfer, S. 2012. Faith in intuition and behavioral biases. *Journal of Economic Behavior and Organization*, 841, 459 182-192. <https://doi.org/10.1016/j.jebo.2012.08.004>
- Avram, L. A. 2018. Gender differences and other findings on the cognitive reflection test. *Studia Universitatis Babes Bolyai-Oeconomica*, 461 633, 56-67. <https://doi.org/10.2478/subboec-2018-0014>
- Bar-Hillel, M., Noah, T., and Shane, F. 2019. Solving stumpers, CRT and CRAT: Are the abilities related? *Judgment and Decision Making*, 145, 620-623.
- Baron, J., Scott, S., Fincher, K., and Metz, S. E. 2015. Why does the cognitive reflection test sometimes predict utilitarian moral judgment and other things? *Journal of Applied Research in Memory and Cognition*, 43, 265–284. <https://doi.org/10.1016/j.jar-466>
- Bialek, M., Bergelt, M., Majima, Y., and Koehler, D. J. 2019. Cognitive reflection but not reinforcement sensitivity is consistently associated with delay discounting of gains and losses. *Journal of Neuroscience, Psychology, and Economics*, 123-4, 169-183. <https://doi.org/10.1037/npe0000111>
- Bosch-Domènech, A., Brañas-Garza, P., and Espín, A. M. 2014. Can exposure to prenatal sex hormones 2D: 4D predict cognitive reflection? *Psychoneuroendocrinology*, 43, 1-10. <https://doi.org/10.1016/j.psyneuen.2014.01.023>
- Bosley, S. A., Bellemare, M. F., Umwali, L., and York, J. 2019. Decision-making and vulnerability in a pyramid scheme fraud. *Journal of Behavioral and Experimental Economics*, 80, 1-13. <https://doi.org/10.1016/j.socec.2019.02.011>

- Bronstein, M. V., Pennycook, G., Bear, A., Rand, D. G., and Cannon, T. D. 2019. Belief in fake news is associated with delusionality, 479 dogmatism, religious fundamentalism, and reduced analytic thinking. *Journal of Applied Research in Memory and Cognition*, 81, 480 108-117. <https://doi.org/10.1016/j.jarmac.2018.09.005> 481
- Brosnan, M., Hollinworth, M., Antoniadou, K., and Lewton, M. 2014. Is empathizing intuitive and systemizing deliberative? *Personality and Individual Differences*, 66, 39-43. <https://doi.org/10.1016/j.paid.2014.03.006> 483
- Browne, M., Pennycook, G., Goodwin, B., and McHenry, M. 2014. Reflective minds and open hearts: Cognitive style and personality 484 predict religiosity and spiritual thinking in a community sample. *European Journal of Social Psychology*, 447, 736-742. 485 <https://doi.org/10.1002/ejsp.2059> 486
- Burger, A. M., Pfattheicher, S., and Jauch, M. 2020. The role of motivation in the association of political ideology with cognitive 489 performance. *Cognition*, 195, 104124. <https://doi.org/10.1016/j.cognition.2019.104124> 490
- Byrd, N., and Conway, P. 2019. Not all who ponder count costs: Arithmetic reflection predicts utilitarian tendencies, but logical 491 reflection predicts both deontological and utilitarian tendencies. *Cognition*, 192, 103995. <https://doi.org/10.1016/j.cognition.2019.06.007> 493
- Cáceres, P., and San Martín, R. 2017. Low cognitive impulsivity is associated with better gain and loss learning in a probabilistic 494 decision-making task. *Frontiers in Psychology*, 8, 204. <https://doi.org/10.3389/fpsyg.2017.00204> 495
- Calvillo, D. P., Swan, A. B., and Rutchick, A. M. 2020. Ideological belief bias with political syllogisms. *Thinking and Reasoning*, 262, 496 291-310. <https://doi.org/10.1080/13546783.2019.1688188> 497
- Campitelli, G., and Gerrans, P. 2014. Does the cognitive reflection test measure cognitive reflection? A mathematical modeling ap-498 proach. *Memory and Cognition*, 423, 434-447. <https://doi.org/10.3758/s13421-013-0367-9> 499
- Campitelli, G., and Labollita, M. 2010. Correlations of cognitive reflection with judgments and choices. *Judgment and Decision Making*, 500 53, 182-191. 501
- Capraro, V., Corgnet, B., Espín, A. M., and Hernán-González, R. 2017. Deliberation favours social efficiency by making people dis-502 regard their relative shares: Evidence from USA and India. *Royal Society Open Science*, 42, 160605. 503 <https://doi.org/10.1098/rsos.160605> 504
- Čavojová, V., Secară, E. C., Jurkovič, M., and Šrol, J. 2019. Reception and willingness to share pseudo-profound bullshit and their 505 relation to other epistemically suspect beliefs and cognitive ability in Slovakia and Romania. *Applied Cognitive Psychology*, 332, 506 299-311. <https://doi.org/10.1002/acp.3486> 507
- Cheng, J., and Janssen, C. 2019. The relationship between an alternative form of cognitive reflection test and intertemporal choice. 508 *Studia Psychologica*, 612, 86-98. <https://doi.org/10.21909/sp.2019.02.774> 509
- Corgnet, B., Espín, A. M., and Hernán-González, R. 2015. Creativity and cognitive skills among millennials: Thinking too much and 515 creating too little. *Frontiers in Psychology*, 7, 1626. <https://doi.org/10.3389/fpsyg.2016.01626> 516

- Corngnet, B., Espín, A. M., and Hernán-González, R. 2016. The cognitive basis of social behavior: Cognitive reflection overrides anti-517 social but not always prosocial motives. *Frontiers in Behavioral Neuroscience*, 9, 287. <https://doi.org/10.3389/fnbeh.2015.00287> 518
- Drummond, C., and Fischhoff, B. 2017. Development and validation of the scientific reasoning scale. *Journal of Behavioral Decision Making*, 301, 26-38. <https://doi.org/10.1002/bdm.1906> 525
- Dutt, K., and Inukai, K. 2015. Complexity aversion: Influences of cognitive abilities, culture and system of thought. *Economic Bulletin*, 352, 846-855. 527
- Finucane, M. L., and Gullion, C. M. 2010. Developing a tool for measuring the decision-making competence of older adults. *Psychology and Aging*, 252, 271-288. <https://doi.org/10.1037/a0019106>. 540
- Fosgaard, T. R., Hansen, L. G., and Wengström, E. 2019. Cooperation, framing, and political attitudes. *Journal of Economic Behavior and Organization*, 158, 416-427. <https://doi.org/10.1016/j.jebo.2018.12.010> 542
- Frederick, S. 2005. Cognitive reflection and decision making. *Journal of Economic Perspectives*, 19, 25-42. 543 <https://doi.org/10.1257/089533005775196732> 544
- Gervais, W. M., van Elk, M., Xygalatas, D., McKay, R. T., Aveyard, M., Buchtel, E. E., Dar-Nimrod, I., Klocova, E. K., Ramsay, J. E.; 545 Riekk, T.; Svedholm-Hakkinen, A. M., and Bulbulia, J. 2018. Analytic atheism: A cross-culturally weak and fickle phenomenon? 546 *Judgment and Decision making*, 133, 268-274. 547
- Grossman, Z., van der Weele, J., and Andrijevik, A. 2014. A test of dual-process reasoning in charitable giving (Working Paper). 548 University of California Santa Bárbara. <https://escholarship.org/uc/item/4tm617f7> 549
- Guthrie, C., Rachlinski, J. J., and Wistrich, A. J. 2007. Blinking on the bench: How judges decide cases. *Cornell Law Review*, 931, 1-44. 550
- Kahan, D. M. 2017. 'Ordinary science intelligence': A science-comprehension measure for study of risk and science communication, 557 with notes on evolution and climate change. *Journal of Risk Research*, 208, 995-1016. 558 <https://doi.org/10.1080/13669877.2016.1148067> 559
- Kiss, H. J., Rodriguez-Lara, I., and Rosa-García, A. 2016. Think twice before running! Bank runs and cognitive abilities. *Journal of Behavioral and Experimental Economics*, 64, 12-19. <https://doi.org/10.1016/j.socec.2015.01.006> 567
- Koehler, D. J., and Pennycook, G. 2019. How the public, and scientists, perceive advancement of knowledge from conflicting study 568 results. *Judgment and Decision Making*, 166, 671-682. 569
- Lohse, J. 2016. Smart or selfish—when smart guys finish nice. *Journal of Behavioral and Experimental Economics*, 64, 28-40. 579 <https://doi.org/10.1016/j.socec.2016.04.002> 580
- Mandel, D. R., and Kapler, I. V. 2018. Cognitive style and frame susceptibility in decision-making. *Frontiers in Psychology*, 9, 1461. 583 <https://doi.org/10.3389/fpsyg.2018.01461> 584
- Muñoz-Murillo, M., Álvarez-Franco, P. B., and Restrepo-Tobón, D. A. 2020. The role of cognitive abilities on financial literacy: New 594 experimental evidence. *Journal of Behavioral and Experimental Economics*, 84, 101482. <https://doi.org/10.1016/j.socec.2019.101482> 595



- Narayanan, A., and Moritz, B. B. 2015. Decision making and cognition in multi-echelon supply chains: An experimental study. 596 *Production and Operations Management*, 248, 1216-1234. <https://doi.org/10.1111/poms.12343> 597
- Obrecht, N. A., Chapman, G. B., and Gelman, R. 2009. An encounter frequency account of how experience affects likelihood estimation. *Memory and Cognition*, 37, 632-643. <https://doi.org/10.3758/MC.37.5.632>. 601
- Otero, I. 2019. Construct and criterion validity of cognitive reflection [Doctoral dissertation, University of Santiago de Compostela]. 602 <https://minerva.usc.es/xmlui/handle/10347/20521> 603
- Otero, I. 2020. [Unpublished raw data on the sex differences in cognitive reflection]. University of Santiago de Compostela. 604
- Pennycook, G., Cheyne, J. A., Koehler, D. J., and Fugelsang, J. A. 2016. Is the cognitive reflection test a measure of both reflection and intuition? *Behavior Research Methods*, 48, 341-348. <https://doi.org/10.3758/s13428-015-0576-1> 617
- Pennycook, G., Cheyne, J. A., Seli, P., Koehler, D. J., and Fugelsang, J. A. 2012. Analytic cognitive style predicts religious and para-normal belief. *Cognition*, 123, 335-346. <https://doi.org/10.1016/j.cognition.2012.03.003> 619
- Pennycook, G., and Rand, D. G. 2019a. Lazy, not biased: Susceptibility to partisan fake news is better explained by lack of reasoning than by motivated reasoning. *Cognition*, 188, 39-50. <https://doi.org/10.1016/j.cognition.2018.06.011> 621
- Pennycook, G., and Rand, D. G. 2019b. Who falls for fake news? The roles of bullshit receptivity, overclaiming, familiarity, and analytic thinking. *Journal of Personality*, 88, 185-200. <https://doi.org/10.1111/jopy.12476> 623
- Ponti, G., and Carbone, E. 2009. Positional learning with noise. *Research in Economics*, 63, 225-241. 624 <https://doi.org/10.1016/j.rie.2009.09.002> 625
- Ponti, G., Rodriguez-Lara, I., and Di Cagno, D. 2014. Doing it now or later with payoff externalities: Experimental evidence on social time preferences (Working Paper No. 5). <http://static.luiss.it/RePEc/pdf/cesare/1401.pdf> 627
- Primi, C., Donati, M. A., Chiesi, F., and Morsanyi, K. 2018. Are there gender differences in cognitive reflection? Invariance and differences related to mathematics. *Thinking and Reasoning*, 24, 258-279. <https://doi.org/10.1080/13546783.2017.1387606> 632
- Primi, C., Morsanyi, K., Chiesi, F., Donati, M. A., and Hamilton, J. 2015. The development and testing of a new version of the cognitive reflection test applying item response theory IRT. *Journal of Behavioral Decision Making*, 29, 453-469. <https://doi.org/10.1002/bdm.1883> 635
- Razmyar, S., and Reeve, C. L. 2013. Individual differences in religiosity as a function of cognitive ability and cognitive style. *Intelligence*, 41, 667-673. <https://doi.org/10.1016/j.intell.2013.09.003> 639
- Royzman, E. B., Landy, J. F., and Leeman, R. F. 2015. Are thoughtful people more utilitarian? CRT as a unique predictor of moral minimalism in the dilemmatic context. *Cognitive Science*, 39, 325-352. <https://doi.org/10.1111/cogs.12136> 646

- Sajid, M., and Li, M. C. 2019. The role of cognitive reflection in decision making: Evidence from Pakistani managers. *Judgment and Decision Making*, 145, 591-604. 648
- Schulze, C., and Newell, B. R. 2015. Compete, coordinate, and cooperate: How to exploit uncertain environments with social interaction. *Journal of Experimental Psychology: General*, 1445, 967-981. <https://doi.org/10.1037/xge0000096> 655
- Sinayev, A., and Peters, E. 2015. Cognitive reflection vs. calculation in decision making. *Frontiers in Psychology*, 6, 532. 658 <https://doi.org/10.3389/fpsyg.2015.00532> 659
- Sirota, M., Kostovičová, L., Juanchich, M., Dewberry, C., and Marshall, A. C. 2021. Measuring cognitive reflection without maths: Developing and validating the verbal cognitive reflection test. *Journal of Behavioral Decision Making*, 343, 322-343. 663 <https://doi.org/10.1002/bdm.2213> 664
- Skagerlund, K., Lind, T., Strömbäck, C., Tinghög, G., and Västfjäll, D. 2018. Financial literacy and the role of numeracy—how individuals' attitude and affinity with numbers influence financial literacy. *Journal of Behavioral and Experimental Economics*, 74, 18-666 25. <https://doi.org/10.1016/j.socec.2018.03.004> 667
- Šrol, J. 2018. Dissecting the expanded cognitive reflection test: An item response theory analysis. *Journal of Cognitive Psychology*, 307, 673 643-655. <https://doi.org/10.1080/20445911.2018.1518327> 674
- Stagnaro, M., Pennycook, G., and Rand, D. G. 2018. Performance on the cognitive reflection test is stable across time. *Judgment and Decision Making*, 133, 260-267. 676
- Stagnaro, M. N., Ross, R. M., Pennycook, G., and Rand, D. G. 2019. Cross-cultural support for a link between analytic thinking and disbelief in God: Evidence from India and the United Kingdom. *Judgment and Decision Making*, 142, 179-186. 678
- Ståhl, T., and Van Prooijen, J. W. 2018. Epistemic rationality: Skepticism toward unfounded beliefs requires sufficient cognitive ability and motivation to be rational. *Personality and Individual Differences*, 122, 155-163. <https://doi.org/10.1016/j.paid.2017.10.026> 680
- Stieger, S., and Reips, U. D. 2016. A limitation of the cognitive reflection test: Familiarity. *PeerJ Life and Environment*, 4, e2395. 682 <https://doi.org/10.7717/peerj.2395> 683
- Svenson, O., Gonzalez, N., and Eriksson, G. 2018. Different heuristics and same bias: A spectral analysis of biased judgments and individual decision rules. *Judgment and Decision Making*, 135, 401-412. 685
- Teigen, K. H., Løhre, E., and Hohle, S. M. 2018. The boundary effect: Perceived post hoc accuracy of prediction intervals. *Judgment and Decision Making*, 134, 309-321. 687
- Thomson, K. S., and Oppenheimer, D. M. 2016. Investigating an alternate form of the cognitive reflection test. *Judgment and Decision Making*, 111, 99-113. 689
- Toplak, M. E., West, R. F., and Stanovich, K. E. 2014. Assessing miserly information processing: An expansion of the cognitive reflection test. *Thinking and Reasoning*, 202, 147-168. <https://doi.org/10.1080/13546783.2013.844729> 693
- Toplak, M. E., West, R. F., and Stanovich, K. E. 2017. Real-world correlates of performance on heuristics and biases tasks in a community sample. *Journal of Behavioral Decision Making*, 302, 541-554. <https://doi.org/10.1002/bdm.1973> 695

- Ventis, L. 2015. Thinking fast and slow in the experience of humor. *International Journal of Humor Research*, 283, 351-373. 696 <https://doi.org/10.1515/humor-2015-0070> 697
- Welsh, M., Burns, N., and Delfabbro, P. 2013. The Cognitive Reflection Test: How much more than numerical ability? In M. Knauff, 702 N. Sebanz, M. Pauen, and I. Wachsmuth Eds., *Proceedings of the annual meeting of the Cognitive Science Society Vol. 35*, pp. 1587-703 1592. Psychology Press. <http://hdl.handle.net/2440/83719><https://cloudfront.escholarship.org/dist/prd/con-704tent/qt68n012fh/qt68n012fh.pdf> 705
- Willard, A. K., and Norenzayan, A. 2017. "Spiritual but not religious": Cognition, schizotypy, and conversion in alternative beliefs. *Cognition*, 165, 137-146. <https://doi.org/10.1016/j.cognition.2017.05.018> 707
- Woike, J. K. 2019. Upon repeated reflection: Consequences of frequent exposure to the cognitive reflection test for Mechanical Turk 710 participants. *Frontiers in Psychology*, 10, 2646. <https://doi.org/10.3389/fpsyg.2019.02646> 711
- Yilmaz, O., and Sarıbay, S. A. 2016. An attempt to clarify the link between cognitive style and political ideology: A non-western 712 replication and extension. *Judgment and Decision Making*, 113, 287-300. 713
- Yilmaz, O., and Sarıbay, S. A. 2017. The relationship between cognitive style and political orientation depends on the measures used. *Judgment and Decision Making*, 122, 140-147. 715
- Yilmaz, O., Sarıbay, S. A., and Iyer, R. 2020. Are neo-liberals more intuitive? Undetected libertarians confound the relation between 716 analytic cognitive style and economic conservatism. *Current Psychology*, 391, 25-32. <https://doi.org/10.1007/s12144-019-0130-x> 717
- Zhang, D. C., Highhouse, S., and Rada, T. B. 2016. Explaining sex differences on the Cognitive Reflection Test. *Personality and Individual Differences*, 101, 425-427. <https://doi.org/10.1016/j.paid.2016.06.034> 721
